# Supplementary material for: Deep learning-enabled detection of hypoxic–ischemic encephalopathy after cardiac arrest in CT scans: a comparative study of 2D and 3D approaches
Source: Front Neurosci. 2024 Feb 14;18:1245791. doi: 10.3389/fnins.2024.1245791 (PMC10899383; doi:10.3389/fnins.2024.1245791)
Supplement: Supplementary file 7 [file Table_1.XLSX]

## Sheet: Tabelle1
Parameter	total	„HIE “	„no HIE“	p-value *
n	168	88	80
Age	60 [48-70]	57 [44-68]	63 [54-72]	0.021
Sex				0.271
Male	118 (70.2%)	60 (68.2%)	58 (72.5%)
OHCA	128 (76.2%)	73 (83.0%)	55 (68.8%)	0.033
Shockable Rhythm (n=167/88/79)	78 (46.7%)	37 (42.0%)	41 (51.9%)	0.205
Primary cause of arrest (n= 166/87/79)				0.075
Cardiac	69 (41.6%)	29 (33.3%)	40 (50.6%)
Respiratory	39 (23.5%)	24 (27.6%)	15 (19.0%)
Other **	58 (34.9%)	34 (39.1%)	24 (30.4%)
Time to ROSC (min) (n=157/81/76)	20 [10-30]	22 [15-60]	12 [8-21]	0.007
Total Adrenalin Dose (mg) (n=157/87/70)	2 [1-5]	4 [2-7]	2 [1-3]	<0.001
APACHE Score (n=165/86/79)	36 [30-40]	37 [31-41]	34 [29-39]	0.1
Length of ICU stay (days)	10 [5-17]	5 [3-11]	15 [10-28]	<0.001
Time on Ventilator (hours)	170 [96-334]	123 [60-235]	242 [135-432]	0.003
CT acquisition (hours after CA) (n=167/88/79)	20 [3-93]	18 [3-85]	34 [4-125]	0.004
Neurological outcome at hospital discharge				<0.001
CPC 1	36	0	36
CPC 2	22	0	22
CPC 3	4	1	3
CPC 4	11	9	2
CPC 5	95	78	17
* Mann-Whitney U test (resp. Welch's t-tests)
** Intoxication, metabolic and unknown cases
